# Supplementary material for: A top-down synthesis of wurtzite Cu2SnS3 nanocrystals for efficient photoelectrochemical performance
Source: Royal Society of Chemistry journal article supplement (doi:10.1039/c8ta00851e), 2018-01-01
Supplement: c8ta00851e1.pdf [file c8ta00851e1.pdf]

**Electronic Supplemental Information (ESI)**

**A top-down synthesis of wurtzite  $\text{Cu}_2\text{SnS}_3$  nanocrystals for efficient  
photoelectrochemical performance**

Weijun Sun, Yangwei Ye, Yu You and Jun Xu\*

School of Electronic Science & Applied Physics, Micro Electromechanical System  
Research Center of Engineering and Technology of Anhui Province, Hefei University  
of Technology, Hefei, 230009, P.R. China

\* E-mail: [apjunxu@hfut.edu.cn](mailto:apjunxu@hfut.edu.cn)

## **Experimental Section**

**Synthesis of Cu<sub>2</sub>O nanocubes.** Cu<sub>2</sub>O nanocubes were synthesized by reacting an ascorbic acid aqueous solution with an [Cu(OH)<sub>4</sub>]<sup>2-</sup> complex solution at room temperature, which was described in detail in our previous report.<sup>[1]</sup>

**Synthesis of wurtzite Cu<sub>2</sub>SnS<sub>3</sub> nanoboxes and nanocrystals.** 10 mL of SnCl<sub>4</sub>·5H<sub>2</sub>O aqueous solution (0.0375 M) was dropwise added into 20 mL of Na<sub>2</sub>S·9H<sub>2</sub>O aqueous solution (0.375 M) to form a transparent tin chalcogenide complex (Sn-MCC) solution. Then, 20 mL of the Cu<sub>2</sub>O nanocubes aqueous suspension (0.0375 M) was added to the above Sn-MCC solution under magnetic stirring. An HCl solution was added into the mixed solution, where the pH value was adjusted to near neutral (~7.5). Afterwards, the mixed suspension was transferred into a Teflon-lined stainless steel autoclave, which was sealed and kept at 190 °C for designed durations, i.e., 1 h for the wurtzite Cu<sub>2</sub>SnS<sub>3</sub> nanoboxes and 20 h for the wurtzite Cu<sub>2</sub>SnS<sub>3</sub> nanocrystals. The black products were collected and washed with distilled water and absolute ethanol several times. Furthermore, tetragonal Cu<sub>2</sub>SnS<sub>3</sub> can be obtained by annealing the as-prepared wurtzite Cu<sub>2</sub>SnS<sub>3</sub> nanostructures in argon at 430 °C for 30 min.

**Growth of ZnO nanorod arrays on FTO substrates.** Arrays of ZnO nanorods on FTO glass substrates were synthesized by a seed-assistant hydrothermal method, which has been described in our previous reports.<sup>[2,3]</sup>

**Preparation of various ZnO/Cu<sub>2</sub>SnS<sub>3</sub> electrodes.** The as-prepared wurtzite Cu<sub>2</sub>SnS<sub>3</sub> nanocrystal (or nanobox) ink with a concentration of ~5 mg/mL were coated on the ZnO nanorod arrays by a spin-coating technique. After annealing at 430 °C for 30 min

in argon, tetragonal Cu<sub>2</sub>SnS<sub>3</sub> nanocrystals modified ZnO nanorod array was obtained.

**Characterization.** Morphologies, sizes, crystal structures, compositions and optical properties of the various samples were studied with X-ray diffraction (XRD, Rigaku D/Max 2500v diffractometer, Cu K $\alpha$  radiation), scanning electron microscopy (SEM, Philips XL30 FEG), transmission electron microscopy (TEM, JEOL JEM-2100F, 200 kV), Raman spectroscopy (Lab RAM HR, 532 nm excitation), X-ray photoelectron spectroscopy (XPS) (Thermo ESCALAB 250Xi, Al K $\alpha$ ), and UV-vis spectroscopy (Cary 5000).

**PEC measurements.** A standard three-electrode configuration in a quartz cell was assembled to carry out PEC performance of the samples using an electrochemical workstation (CHI 660E). The simulated sunlight (CEAULIGHT, CEL-S500) under AM 1.5G illumination at a power density of 100 mW cm<sup>-2</sup> was employed as the light source. A Pt foil and a saturated calomel electrode (SCE) were used as the counter electrode and the reference electrode, respectively. A Na<sub>2</sub>SO<sub>4</sub> aqueous solution (0.5 M) was used as the electrolyte, which was degassed by bubbling pure N<sub>2</sub> for 30 min prior to measurements. The various ZnO/Cu<sub>2</sub>SnS<sub>3</sub> electrodes on the FTO glass substrates with an active area of 0.2 cm<sup>2</sup> were used as the photoanodes for PEC water splitting. Linear sweep voltammetry (LSV) was carried out at a scan rate of 5 mV s<sup>-1</sup> for the polarization curves. The potentials were carefully calibrated to a normal hydrogen electrode (NHE).

Table S1 Recent advance of the synthesis of Cu<sub>2</sub>SnS<sub>3</sub> nanocrystals.

| <b>No.</b> | <b>Materials and morphology</b>               | <b>Solvent</b>  | <b>Reaction temperature and duration</b> | <b>References</b>                    |
|------------|-----------------------------------------------|-----------------|------------------------------------------|--------------------------------------|
| 1          | Cu <sub>2</sub> SnS <sub>3</sub> quantum dots | Ethylene glycol | 180 °C, 12 h                             | Inorg. Chem., 2017, 56, 2198–2203    |
| 2          | Cu <sub>2</sub> SnS <sub>3</sub> quantum dots | DDT             | 230 °C, 50 min                           | RSC Adv., 2017, 7, 23301–23308       |
| 3          | Cu <sub>2</sub> SnS <sub>3</sub> nanocrystals | Oleylamine      | 160 °C, 30 min                           | Chem. Mater., 2015, 27, 1342–1348    |
| 4          | Cu <sub>2</sub> SnS <sub>3</sub> nanocrystals | Oleylamine      | 240 °C, 20 min                           | CrystEngComm, 2014, 16, 8642–8645    |
| 5          | Cu <sub>2</sub> SnS <sub>3</sub> nanocrystals | ODE             | 140 °C, 30 min                           | CrystEngComm, 2016, 18, 2885–2893    |
| 6          | Cu <sub>2</sub> SnS <sub>3</sub> nanocrystals | ODE             | 220 °C, 12 h                             | CrystEngComm, 2013, 15, 5612–5619    |
| 7          | Cu <sub>2</sub> SnS <sub>3</sub> nanorods     | Oleylamine      | 290 °C, 10 min                           | Chem. Commun., 2015, 51, 13810–13813 |
| 8          | Cu <sub>2</sub> SnS <sub>3</sub> nanocrystals | Deionized water | 190 °C, 20 h                             | This work                            |

Table S2 Recent advance of the Cu-based electrodes for PEC application.

| No. | Photoelectrode                         | Electrolyte                               | Applied Potential (V) | Photocurrent Density ( $\text{mA cm}^{-2}$ ) | Stability       | References                                      |
|-----|----------------------------------------|-------------------------------------------|-----------------------|----------------------------------------------|-----------------|-------------------------------------------------|
| 1   | ZnO/CuInS <sub>2</sub>                 | Na <sub>2</sub> S (1 M)                   | 0.29<br>(vs. SCE)     | 17.5                                         | /               | Int. J. Hydrogen Energy, 2012, 37, 15029–15037. |
| 2   | TiO <sub>2</sub> /CuInS <sub>2</sub>   | KOH (1 M)                                 | 0.74<br>(vs. Ag/AgCl) | 19.07                                        | No decay, 5 min | Phys. Chem. Chem. Phys., 2014, 16, 16204–16213. |
| 3   | Pt/ALD-TiO <sub>2</sub> /CdS/CZTS      | Na <sub>2</sub> SO <sub>4</sub> (0.5 M)   | -2<br>(vs. RHE)       | 13                                           | 75%, 60 min     | ACS Energy Lett., 2016, 1, 1127–1136.           |
| 4   | CZTS/Zn(O,S)/TiO <sub>2</sub>          | Na <sub>2</sub> SO <sub>4</sub> (0.5 M)   | 1.23<br>(vs. NHE)     | 15.05                                        | 67%, 60 min     | J. Mater. Chem. A, 2017, 5, 4695–4709.          |
| 5   | TiO <sub>2</sub> /Zn(O,S)/CZTS         | Na <sub>2</sub> SO <sub>4</sub> (1 M)     | 1.23<br>(vs. RHE)     | 8.84                                         | 80%, 120 min    | ACS Catal. 2017, 7, 8077–8089.                  |
| 6   | ZnO/CZTSSe                             | Na <sub>2</sub> SO <sub>4</sub> (0.5 M)   | 1.23<br>(vs. NHE)     | 9.06                                         | 65%, 60 min     | J. Mater. Chem. A, 2017, 5, 25230–25236.        |
| 7   | CZTS/FTO                               | Eu(NO <sub>3</sub> ) <sub>3</sub> (0.2 M) | 0.5<br>(vs. Ag/AgCl)  | 1.8                                          | No decay, 6 min | Chem. Commun., 2011, 47, 3141–3143.             |
| 8   | ZnO/Cu <sub>2</sub> SnS <sub>3</sub>   | Na <sub>2</sub> SO <sub>4</sub> (0.1 M)   | 0.5<br>(vs. SCE)      | 0.46                                         | No decay, 4 min | RSC Adv., 2016, 6, 104041–104048.               |
| 9   | CuRhO <sub>2</sub>                     | NaOH (1 M)                                | -0.9<br>(vs. SCE)     | 1.08                                         | 43%, 8 h        | J. Am. Chem. Soc., 2014, 136, 830–833.          |
| 10  | ZnO/t-Cu <sub>2</sub> SnS <sub>3</sub> | Na <sub>2</sub> SO <sub>4</sub> (0.5 M)   | 1.23<br>(vs. NHE)     | 6.46                                         | 73%, 60 min     | This work                                       |

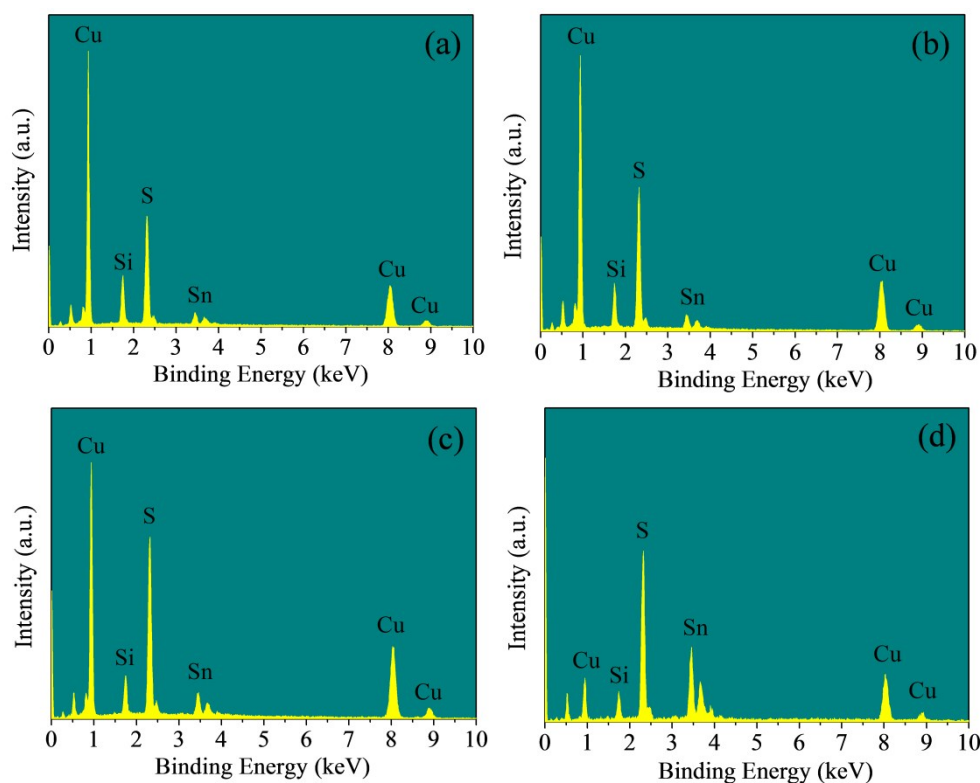

Fig. S1 EDX spectra of (a) the  $\text{Cu}_7\text{S}_4$  nanoboxes, (b) the  $\text{CuS}$  nanoboxes obtained after hydrothermal reaction for 20 min, (c) the  $\text{CuS}$  nanoboxes obtained after hydrothermal reaction for 40 min, (d) the  $\text{Cu}_2\text{SnS}_3$  nanoboxes obtained after hydrothermal reaction for 1 h. These samples were coated on Si wafers for EDX measurement.

It is observed that very slight Sn contents (1-4 at%) were detected for the  $\text{Cu}_7\text{S}_4$ ,  $\text{CuS}$  (20 min) and  $\text{CuS}$  (40 min) nanoboxes (Fig. S1a-c). Such a phenomenon is attributed to the adsorption of some Sn ions from the growth solution by Sn-S bonding on the surface of the various copper sulfides nanoboxes. After 1 h of hydrothermal reaction, an obvious increase in Sn content (17 at%) along with a distinct decrease in Cu content of the nanoboxes are observed (Fig. R1d), owing to the formation of  $\text{Cu}_2\text{SnS}_3$ .

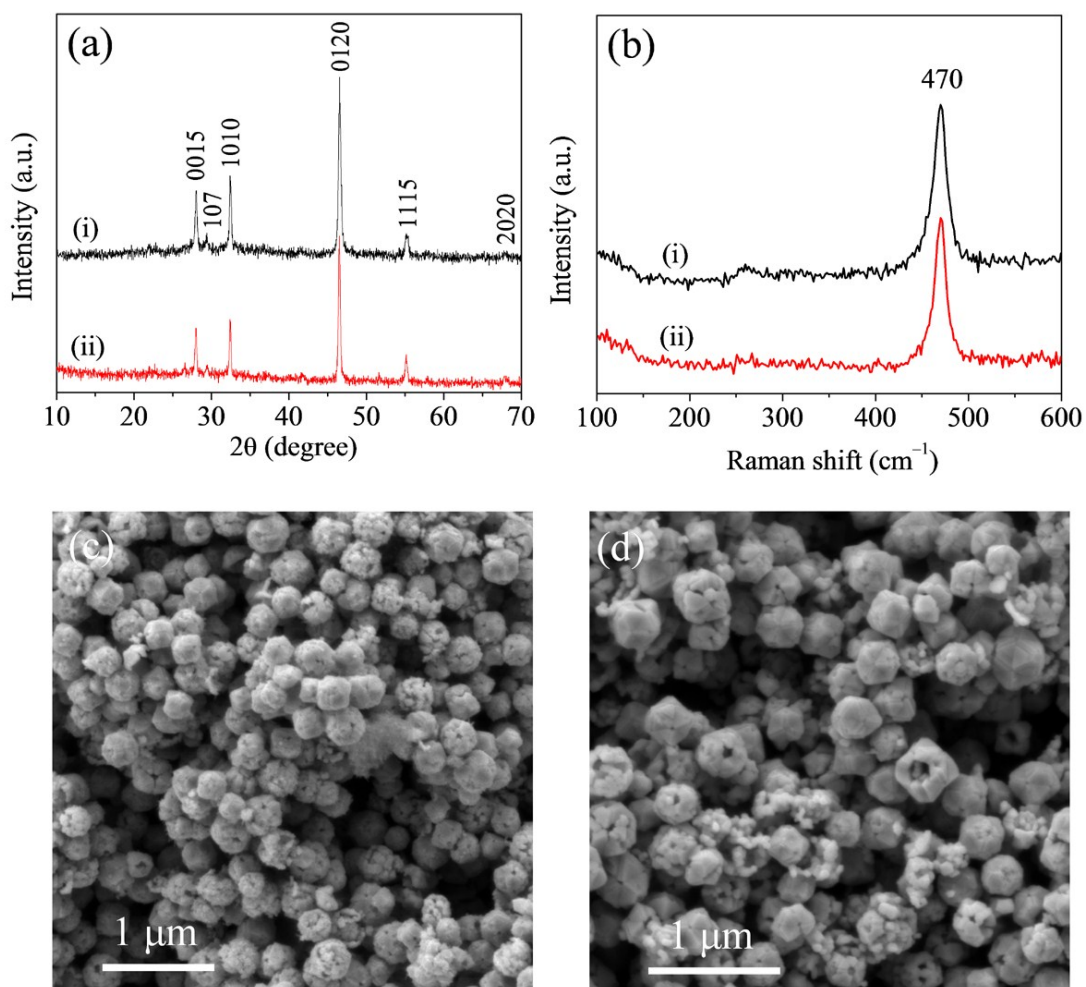

Fig. S2 (a,b) XRD patterns (a) and Raman spectra (b) of the  $\text{Cu}_{1.8}\text{S}$  samples prepared in the alkaline growth solution for (i) 3 h and (ii) 20 h. (c,d) SEM images of the  $\text{Cu}_{1.8}\text{S}$  sample prepared in alkaline growth solution for (c) 3 h and (d) 20 h.

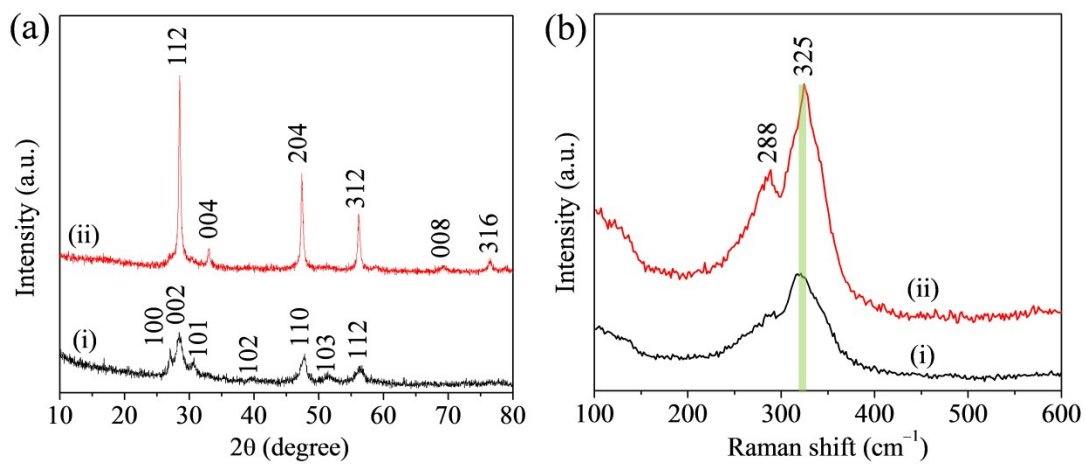

Fig. S3 XRD patterns (a) and Raman spectra (b) of the wurtzite  $\text{Cu}_2\text{SnS}_3$  nanocrystals before (i) and after (ii) post-thermal annealing at 430 °C in a  $\text{N}_2$  flow.



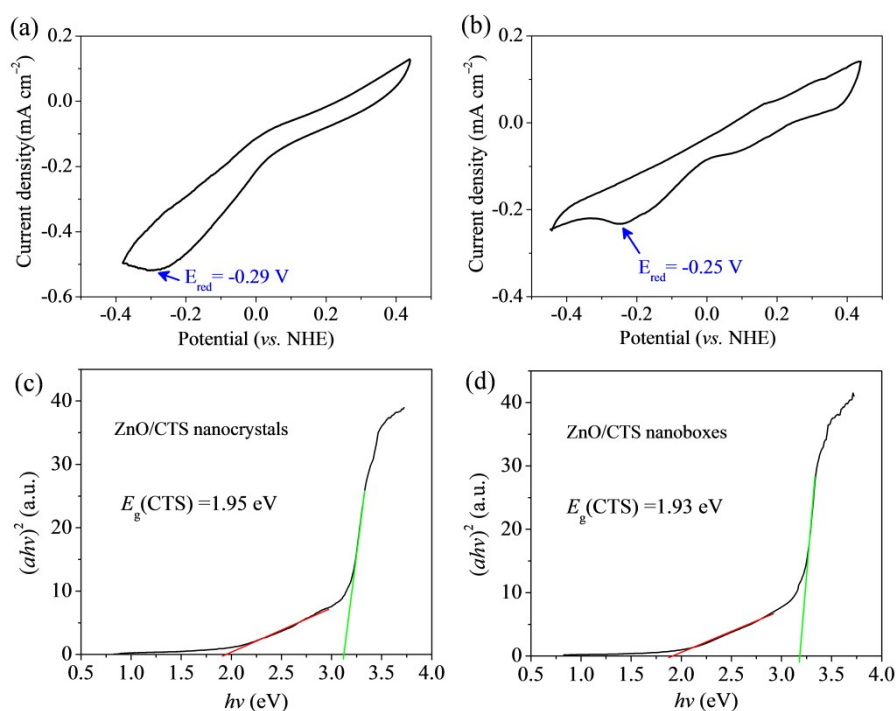

Fig. S4 (a,b) CV curves of (a) the w-CTS nanocrystals and (b) the w-CTS nanoboxes at  $10 \text{ mV s}^{-1}$ . (c,d) the dependence of  $(ah\nu)^2$  on  $h\nu$  for the ZnO/w-CTS-NC and the ZnO/w-CTS-NB.

The band levels of the CTS nanoboxes and nanocrystals can be determined by the electrochemical cyclic voltammetry (CV) method. The CTS electrodes, a Pt foil, and a calomel electrode were used as the working electrode, the counter electrode and the reference electrode, respectively. The CV curves were presented in **Fig. S4a and S4b**. The reduction peaks in the cyclic voltammograms correspond to the conduction band (CB) positions. It is revealed that  $E_{\text{red}}$  is  $-0.29 \text{ V}$  (vs. NHE) for the CTS nanocrystals and  $-0.25 \text{ V}$  (vs. NHE) for the CTS nanoboxes.

The CB energy level value can be calculated according to the following relation (ACS Appl. Mater. Interfaces 2017, 9, 34915–34926; J. Phys. Chem. A 2004, 108, 376–383):

$$E_{\text{CB}} = eE_{\text{red}} (\text{V}) = -4.5 (\text{eV}) - e E_{\text{red}} (\text{vs. NHE}) \quad (1)$$

Thus, the  $E_{\text{CB}}$  value is calculated to be  $-4.21 \text{ eV}$  for the w-CTS nanocrystals and  $-4.25 \text{ eV}$  for the w-CTS nanoboxes.

The bandgap ( $E_{\text{g}}$ ) of the can be calculated by UV-vis absorption spectra shown in Fig. 4c in the manuscript. It is revealed that the bandgap is estimated to be  $1.95 \text{ eV}$  for the

w-CTS the nanocrystals and 1.93 eV for the w-CTS the nanoboxes (Fig. S4c and S4d). ZnO has a bandgap of 3.2 eV and a  $E_{CB}$  of -4.36 eV (*Proc. Natl. Acad. Sci. USA*, 2011, 108, 29). Therefore, the photoanode exhibits a type-II energy level alignment between ZnO and  $Cu_2SnS_3$  (both nanoboxes and nanocrystals) as depicted in Fig. 4e of the manuscript.

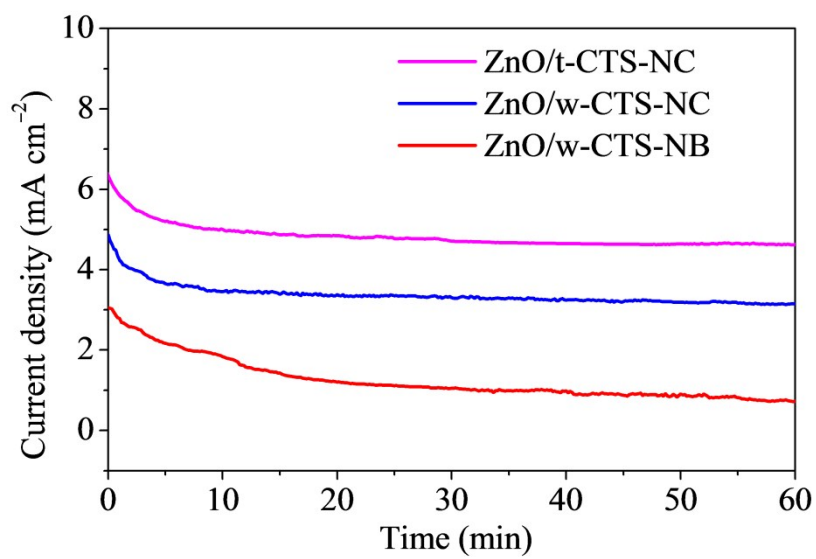

Fig. S5 Time-dependent photoresponses of the three photoanodes at a bias of 1.23 V (vs. NHE).

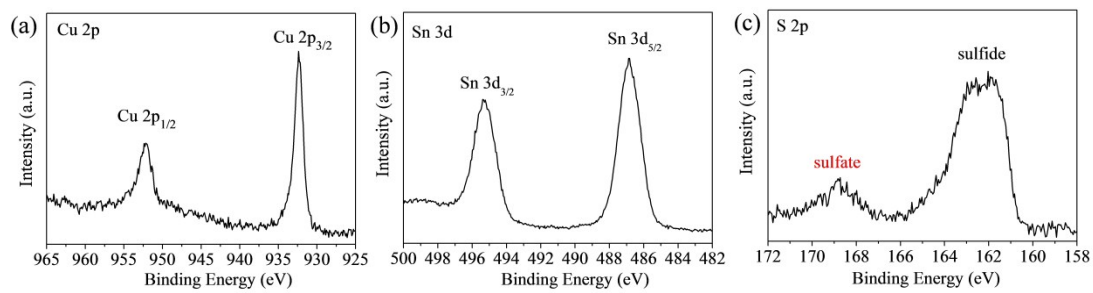

Fig. S6 XPS spectra of the ZnO/CTS photoanode after stability test. It is revealed that sulfide ( $S^{2-}$ ) was partially oxidized to sulfate ( $SO_4^{2-}$ ).

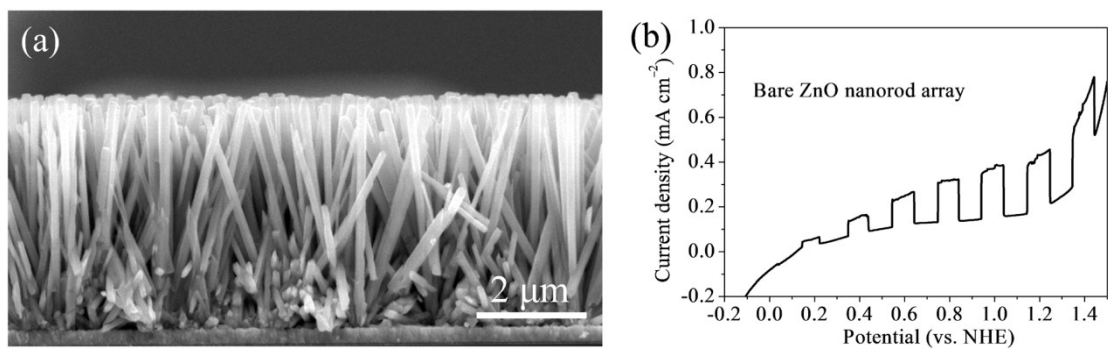

Fig. S7 (a) The SEM image of the bare ZnO nanorod array, (b) the chopped LSV curve of the bare ZnO nanorod array.

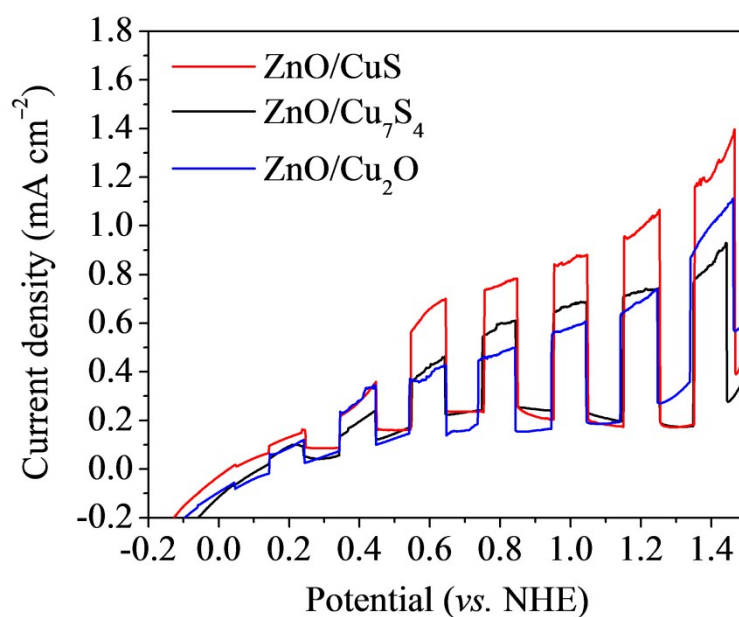

Fig. S8 The chopped LSV curves of the ZnO/Cu<sub>2</sub>O, ZnO/Cu<sub>7</sub>S<sub>4</sub> and ZnO/CuS photoanodes.

Fig. S8 shows the chopped LSV curves of the ZnO/Cu<sub>2</sub>O, the ZnO/Cu<sub>7</sub>S<sub>4</sub> and the ZnO/CuS photoanodes. It is observed that the photocurrent density at 1.23 V vs. NHE is 0.71 mA cm<sup>-2</sup> for the ZnO/Cu<sub>2</sub>O, 0.74 mA cm<sup>-2</sup> for the ZnO/Cu<sub>7</sub>S<sub>4</sub>, 1.04 mA cm<sup>-2</sup> for the ZnO/CuS. All these values are much smaller than those of the ZnO/CTS photoanodes (Fig. 4e). The poor PEC performance of the ZnO/Cu<sub>2</sub>O photoanode is probably attributed to the weak stability of Cu<sub>2</sub>O that is very susceptible to oxidation in solution. It is observed that the yellow Cu<sub>2</sub>O can quickly turn to be brownish black (CuO) during PEC measurement. On the other hand, the indirect bandgap nature of Cu<sub>7</sub>S<sub>4</sub> and CuS may determine their weak PEC performance relative to the ZnO/CTS photoanodes.

## References:

- [1] Z. Hu, R. Zhou, W. Sun, J. Zhang, C.-S. Lee and J. Xu, *Mater. Today Energy*, 2017, **5**, 331–337.
- [2] J. Xu, X. Yang, Q.-D. Yang, T.-L. Wong, S.-T. Lee, W.-J. Zhang and C.-S. Lee, *J. Mater. Chem.*, 2012, **22**, 13374–13379.
- [3] J. Xu, X. Yang, H. Wang, X. Chen, C. Luan, Z. Xu, Z. Lu, V. A. L. Roy, W. Zhang and C.-S. Lee, *Nano Lett.*, 2011, **11**, 4138–4143.
